# Supplementary material
Source: PubMed Central journal article supplement (PMC1622772)

oG:C

WT

N149C

10 min  
20 min  
30 min  
40 min  
60 min  
120 min

10 min  
20 min  
30 min  
40 min  
60 min  
120 min

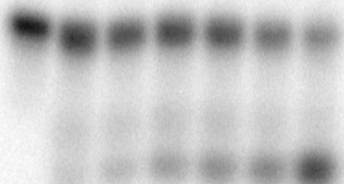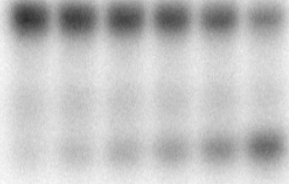

Supplement: pnas_0603644103_1.pdf [file pnas_0603644103_1.pdf]
